# Supplementary material for: Energy Transition and Economic Growth in African OPEC Countries
Source: Research Square preprint supplement (doi:10.21203/rs.3.rs-8535423/v1), 2026-02-03
Supplement: Supplementary file 1 [file d078005438e4ce5b8bc84bc3.docx]

**Table 1. Summary of existing empirical studies**

| **Authors/years** | **Countries & scope** | **Energy variables** | **Estimation Tech** | **Findings** |
| --- | --- | --- | --- | --- |
| **Energy consumption and Economic growth** | | | | |
| Ozturk and Bilgili (2015) | 51 Sub-Saharan African Countries (1980–2009) | Biomass, GDP | Dynamic panel OLS | Positive relationship |
| Alper, A., & Oguz O. (2016) | Eight EU member countries (1990-2009) | REC, EG, | Asymmetric Causality Test/ ARDL Approach | Positive/meaningful relationship between REC and EG |
| Afonso, T., Marques A., and Fuinhas J. (2017) | 28 countries (1998-2013) | Total RE and NRE | ARDL (PMG & MG) | NRE has a positive effect. |
| Kocak. E., and Sarkqunesi, A. (2017) | 9 black sea and Balkan Countries (1900-2012) | REC, EG | Heterogeneous Panel Causality Test | Significant and Positive |
| Fotourehchi (2017) | 42 developing Countries | REC & Economic Growth | Long-run Causality Test | REC & EG have a positive long-run causal effect |
| Morinas, M., Dinu, M., Socol, A., and Socol, C. (2018) | 7 CEE States (1990-2014) | REC, EG | ARDL | Positive relationship/Bi-directional causality between REC & GDP |
| Da Silva, Cerqueira & Ogbe (2018) | SSA | REC & EG | Panel ARDL | A Positive Relationship exists between REC and EG |
| Aydin (2019) | 26 OECD countries (1980-2015) | Total RE and NRE | Panel Frequency Causality | Bidirectional causality between NEC and economic growth |
| Charfeddine and Kahia (2019) | 24 MENA countries (1980-2015) | RE & EG | Panel vector autoregression | RE has a slight influence on EG |
| Awodumi, O. B., & Adewuyi, A.O. (2020) | OPEC African Countries (1980-2015) | NRE, CO2  & EG | NARDL | Positive & Negative relationship between NRE, CO2, and EG |
| Kasperowicz et al (2020) | 29 EU countries (1995-2016) | RE & EG | Panel Co-integration | A positive impact exists between RE and Economic growth |
| Bhuiyan, Zhang, Khare, Mikhaylov, Pinter & Huang (2022) | 46 articles collected from SCI/SSCI index Journals (2010-2021) | REC & EG | PRISMA | REC does not hinder economic growth |
| Jia, Fan, and Xia (2023) | Belt and Road Countries (2000-2019) | REC & Economic Growth | Granger causality & mediating effect model | Bi-directional causal relationship between REC and EG. |
| Muazu, Yu, and Liu (2023) | 54 African countries (1990 -2018) | REC & Economic growth | Panel threshold regression model | A negative and non-linear relationship exists between RE and EG. |
| Chen, Pinar, and Stengos (2020) | 103 OECD countries  (1995-2015) | REC & EG | GMM (FD-GMM) | REC does not affect Economic growth. |
| **Country-Specific Study** | | | | |
| Luqman M., Ahmed, N., and Bakhsh, K. (2019) | Pakistan (1990-2016) | RE & Nuclear | NARDL | Positive and negative shocks of RE; Nuclear have a positive effect |
| Dinc & Akdogan (2019) | Turkey (1980-2016) | REC & EG | VECM | Bidirectional relationship between REC and EG |
| Pearson (2021) | Croatia (1996-2018) | REC & EG | ARDL | Positive and Significant relationship |
| Mohammed, H., Alim, M., and Youssef (2021) | Pakistan (1980-2015) | Fossil Energy, Inequalities, and GDP | ARDL/Granger Causality | Bi-directional, unidirectional causality/ positive and negative |
| Lin and Mubarak (2014) | China (1977-2011) | REC and EG | ARDL | Bi-directional Causality between renewable energy and economic growth. |

**Authors Compilation 2025**

**Table 2: DESCRIPTION OF MODEL VARIABLES**

| **Variables** | **Definition/Source** | **Previous studies** |
| --- | --- | --- |
| **Dependent Variable** | | |
| GDPPC | GDP per capita is gross domestic product divided by midyear population. (World Bank) | Vostriakova (2021) and Aydin (2019) |
| **Independent Variable** | | |
| Fossil Fuel | Fossil fuel comprises coal, oil, petroleum, and natural gas products. (World Bank) | Ozturk and Bilgili (2015) |
| Renewable Energy Consumption | The share of renewable energy in total final energy consumption (World Bank). | Vostriakova (2021), Pearson (2021), Silva, Cerqueira & Ogbe (2018) |
| **Control Variable** | | |
| Population Growth | The annual population growth rate for year t is the exponential rate of growth of midyear population from year t-1 to t, expressed as a percentage. (World Bank). | World Bank |

**Authors Compilation (2025)**

**Table 3: Preliminary Test Result**

| **Variables** | **Panel**  **ARDL** | **Algeria** | **Nigeria** | **Gabon** | **Angola** | **Libya** | **Dem Rep of Congo** | **Rep Congo** | **Equatorial Guinea** |
| --- | --- | --- | --- | --- | --- | --- | --- | --- | --- |
| **(x)** |  | **Standard Mean (x)** | | | | | | | |
| **GDPPC** | 2.7035 | 0.73821 | 1.57885 | -0.5935 | 3.56562 | 0.7635 | 0.7634 | 1.9640 | 10.4716 |
| **FFC** | 52.4832 | 99.8608 | 50.7935 | 26.4393 | 36.1336 | 97.5448 | 97.5449 | 34.7215 | 69.0991 |
| **REC** | 52.4362 | 0.30588 | 84.2324 | 80.5937 | 62.0656 | 2.6906 | 2.6906 | 67.1000 | 30.5939 |
| **PGR** | 2.9391 | 1.83293 | 2.58795 | 2.8058 | 3.4846 | 2.5879 | 2.5880 | 2.8911 | 4.1098 |
|  |  | **Standard Deviation (x)** | | | | | | | |
| **GDPPC** | 13.9386 | 2.49592 | 3.7012 | 3.3219 | 7.6058 | 33.7674 | 33.7673 | 4.9972 | 28.6911 |
| **FFC** | 34.2426 | 0.10584 | 4.5945 | 6.3119 | 10.4732 | 1.2244 | 1.2244 | 9.5483 | 30.6472 |
| **REC** | 37.0696 | 0.15164 | 2.7806 | 7.1283 | 10.3927 | 0.3701 | 0.3701 | 6.3633 | 31.7555 |
| **PGR** | 0.8073 | 0.33697 | 0.2246 | 0.3861 | 0.23331 | 0.2246 | 0.2246 | 0.5708 | 1.0081 |
|  |  | **Cumulative Variance** | | | | | | | |
| **GDPPC** | 5.1558 | 3.3810 | 2.3442 | -5.5971 | 2.1331 | 44.2271 | 44.2328 | 2.5444 | 2.7399 |
| **FFC** | 0.6524 | 0.0011 | 0.0905 | 0.2387 | 0.2898 | 0.0126 | 0.0126 | 0.2750 | 0.4435 |
| **REC** | 0.7069 | 0.4957 | 0.0330 | 0.0884 | 0.1674 | 0.1376 | 0.1376 | 0.0948 | 1.0380 |
| **PGR** | 0.2747 | 0.1838 | 0.0868 | 0.1376 | 0.0670 | 0.0868 | 0.0868 | 0.1974 | 0.2453 |
|  |  | **Correlation Metrics** | | | | | | | |
| **GDPPC vs FFC** | -0.065 | -0.527 | -0.066 | 0.113 | -0.032 | 0.259 | 0.259 | -0.080 | -0.423 |
| **GDPPC vs REC** | 0.045 | 0.282 | 0.067 | -0.122 | 0.042 | -0.204 | -0.204 | -0.423 | 0.422 |
| **GDPPC vs PGR** | 0.248 | -0.626 | 0.426 | 0.272 | 0.398 | 0.049 | 0.049 | 0.500 | 0.209 |
|  |  | **ADF Unit Root Test** | | | | | | | |
| **GDPPC** | -9.56  I(1) | -8.703  I(1) | -9.310  I(1) | -6.804  I(1) | -6.171  I(1) | -8.346  I(1) | -8.581  I(1) | -5.755  I(1) | -4.471  I(1) |
| **FFC** | -10.95  I(1) | -5.397  I(1) | -5.637  I(1) | -6.210  I(1) | -6.718  I(1) | -7.946  I(1) | -8.089  I(1) | -4.750  I(1) | -5.248  I(1) |
| **REC** | -11.19  I(1) | -7.904  I(1) | -5.951  I(1) | -4.827  I(1) | -6.353  I(1) | -5.785  I(1) | -5.785  I(1) | -5.937  I(1) | -5.882  I(1) |
| **PGR** | -2.27  I(1) | -4.411  I(0) | -3.944  I(0) | -5.468  I(1) | -5.819  I(0) | -3.744  I(0) | -3.844  I(0) | -6.079  I(1) | -4.969  I(1) |

**Authors Compilation 2025.**

**Table 4.** **Short Run and Long Run ARDL Model**

| **Variables** | **Panel** | **Algeria** | **Nigeria** | **Gabon** | **Angola** | **Dem Rep of Congo** | **Rep Congo** | **Equatorial Guinea** | **% of compliance with the panel result** |
| --- | --- | --- | --- | --- | --- | --- | --- | --- | --- |
| **Dependent Variable- GDPPC** | | | | | | | | |  |
| **LFFC** | -0.13  (0.09) | -3.12  (0.68) | -0.51  (0.08) | 2.95  (0.00) | -4.75  (0.06) | -0.51  (0.52) | 0.72  (0.39) | 0.50  (0.64) | 57.14 % |
| **LREC** | -0.15  (0.06) | -0.11  (0.98) | -1.77  (0.00) | 10.82  (0.00) | -1.22  (0.75) | -23.67  (0.08) | 0.63  (0.80) | 0.46  (0.38) | 57.14% |
| **LPGR** | 2.28  (0.02) | -4.09  (0.04) | 11.90  (0.00) | -0.82  (0.04) | -17.56  (0.01) | -4.97  (0.09) | 4.91  (0.06) | -0.32  (0.83) |  |
| **R2** | NA | 0.59 | 0.52 | 0.90 | 0.58 | 0.58 | 0.89 | 0.56 |  |
| **F-Stat** | NA | 4.53  (0.00) | 5.81  (0.00) | 9.58  (0.01) | 2.79  (0.03) | 2.79  (0.0) | 3.86  (0.01) | 2.86  (0.03 |  |
| **FPSS** | NA | 6.95 | 6.19 | 4.76 | 4.42 | 4.49 | 12.29 | 5.98 |  |
| **ECM-1** | -0.78  (0.00) | -0.91  (0.00) | -0.85  (0.00) | -.2.52  (0.00) | -1.06  (0.00) | -0.89  (0.00) | -1.68  (0.00) | -1.08  (0.00) |  |
| **LM** | NA | 0.12  (0.88) | 0.33  (0.72) | 5.27  (0.10) | 0.33  (0.72) | 3.11  (0.09) | 10.78  (0.08) | 8.23  (0.09) |  |
| **HET** | NA | 0.78  (0.54) | 0.30  (0.91) | 1.69  (0.29) | 0.84  (0.52) | 0.76  (0.61) | 11.19  (0.09) | 0.46  (0.38) |  |
| **RESET** | NA | 0.11  (0.91) | 0.17  (0.86) | 0.33  (0.76) | 0.24  (0.81) | 0.63  (0.54) | 1.03  (0.37) | -0.32  (0.86) |  |

**Authors Compilation 2025**

**Table 5. Pairwise Granger Causality Tests**

| Null Hypothesis | Obs | F statistic | Prob | Direction | Results |
| --- | --- | --- | --- | --- | --- |
| FFC does not Granger Cause GDPPC  GDPPC does not Granger-cause FFC | 230 | 3.3348  10.9869 | 0.0374  3.1205 | Unidirectional | Rejected (5% level)  Not Rejected |
| REC does not Granger-cause GDPPC  GDPPC does not Granger-cause REC | 226 | 1.35577  3.34777 | 0.2599  0.0370 | Unidirectional | Not Rejected  Rejected (5% level) |
| PGR does not Granger-cause GDPPC  GDPPC does not Granger-cause PGR | 235 | 3.58887  0.78666 | 0.0292  0.4566 | Unidirectional | Rejected (5% level)  Not Rejected |

**Author’s Compilation 2025**
